# Supplementary material for: LiSr3Be3B3O9F4: a new ultraviolet nonlinear optical crystal for fourth-harmonic generation of Nd:YAG lasers
Source: Royal Society of Chemistry journal article supplement (doi:10.1039/c7nj00160f), 2017-01-01
Supplement: c7nj00160f1.pdf [file c7nj00160f1.pdf]

Supporting Information

## LiSr<sub>3</sub>Be<sub>3</sub>B<sub>3</sub>O<sub>9</sub>F<sub>4</sub>: A New Ultraviolet Nonlinear Optical Crystal for Fourth-harmonic Generation of Nd:YAG Lasers

Shu Guo,<sup>a,b</sup> Lijuan Liu,<sup>\*,a</sup> Mingjun Xia,<sup>a</sup> Fei liang,<sup>a,b</sup> Zhi Fang,<sup>a,b</sup> Ruofei Wu,<sup>a,b</sup> Xiaoyang Wang,<sup>a</sup> Zheshuai Lin<sup>a</sup> and Chuangtian Chen<sup>a</sup>

<sup>a</sup>Beijing Center for Crystal Research and Development, Key Laboratory of Functional Crystals and Laser Technology, Technical Institute of Physics and Chemistry, Chinese Academy of Sciences, Beijing 100190, China.

<sup>b</sup>University of Chinese Academy of Sciences, Beijing 100049, People's Republic of China

### CONTENTS

|                                                                                                                                                                         |           |
|-------------------------------------------------------------------------------------------------------------------------------------------------------------------------|-----------|
| <b>Figure S1.</b> Powder XRD patterns of LiSr <sub>3</sub> Be <sub>3</sub> B <sub>3</sub> O <sub>9</sub> F <sub>4</sub> before and after melting                        | <b>S2</b> |
| <b>Figure S2.</b> Calculated electronic properties in LiSr <sub>3</sub> Be <sub>3</sub> B <sub>3</sub> O <sub>9</sub> F <sub>4</sub>                                    | <b>S3</b> |
| <b>Table S1.</b> Crystal data and structure refinement for LiSr <sub>3</sub> Be <sub>3</sub> B <sub>3</sub> O <sub>9</sub> F <sub>4</sub>                               | <b>S4</b> |
| <b>Table S2.</b> Selected bond lengths (Å) and bond angles for LiSr <sub>3</sub> Be <sub>3</sub> B <sub>3</sub> O <sub>9</sub> F <sub>4</sub>                           | <b>S5</b> |
| <b>Table S3.</b> Atomic coordinates and equivalent isotropic displacement parameters for LiSr <sub>3</sub> Be <sub>3</sub> B <sub>3</sub> O <sub>9</sub> F <sub>4</sub> | <b>S6</b> |

**Figure S1.** Powder XRD patterns of  $\text{LiSr}_3\text{Be}_3\text{B}_3\text{O}_9\text{F}_4$  before and after melting.

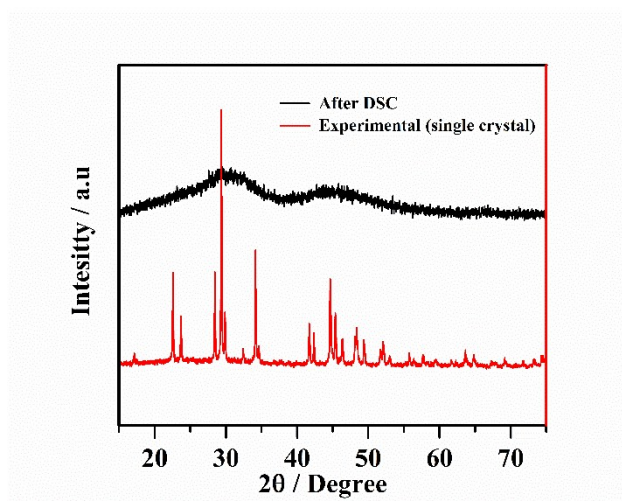

**Figure S2** Calculated electronic properties in  $\text{LiSr}_3\text{Be}_3\text{B}_3\text{O}_9\text{F}_4$ .

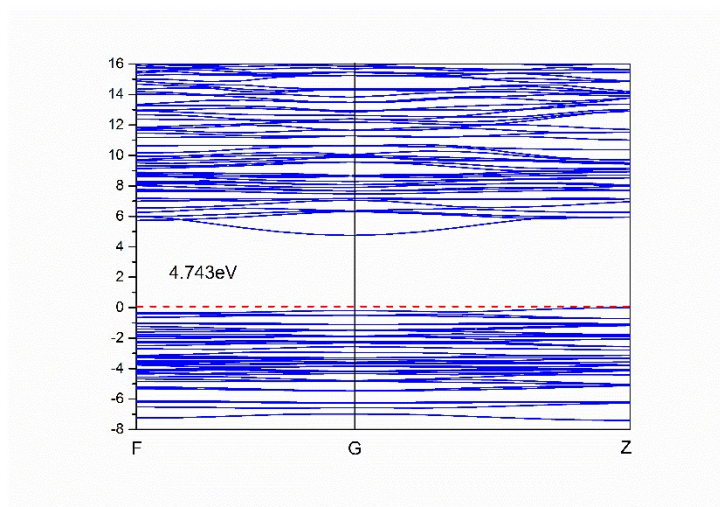

**Table S1.** Crystal data and structure refinement for  $\text{LiSr}_3\text{Be}_3\text{B}_3\text{O}_9\text{F}_4$ .

| Formula                                                     | $\text{LiSr}_3\text{Be}_3\text{B}_3\text{O}_9\text{F}_4$ |
|-------------------------------------------------------------|----------------------------------------------------------|
| <i>formula mass(amu)</i>                                    | 549.26                                                   |
| <i>crystal system</i>                                       | trigonal                                                 |
| <i>space group</i>                                          | <i>R3m</i>                                               |
| <i>a(Å)</i>                                                 | 10.3062(15)                                              |
| <i>b(Å)</i>                                                 | 10.3062(15)                                              |
| <i>c(Å)</i>                                                 | 8.3458(17)                                               |
| <i>α</i>                                                    | 90                                                       |
| <i>β</i>                                                    | 90                                                       |
| <i>γ</i>                                                    | 120                                                      |
| <i>V(Å<sup>3</sup>)</i>                                     | 767.7(2)                                                 |
| <i>Z</i>                                                    | 3                                                        |
| <i>T(K)</i>                                                 | 153.15                                                   |
| <i>ρ(calcd)(g/cm<sup>3</sup>)</i>                           | 3.564                                                    |
| <i>λ (Å)</i>                                                | 0.71073                                                  |
| <i>F(000)</i>                                               | 756.0                                                    |
| <i>θ(deg)</i>                                               | 3.3398-27.4855                                           |
| <i>Cryst size (mm<sup>3</sup>)</i>                          | 0.26×0.24×0.24                                           |
| <i>μ(mm<sup>-1</sup>)</i>                                   | 15.683                                                   |
| <i>R(F)<sup>a</sup></i>                                     | 0.0278(232)                                              |
| <i>R<sub>w</sub>(F<sub>o</sub><sup>2</sup>)<sup>b</sup></i> | 0.0651( 237)                                             |

$${}^a R(F) = \sum | | F_o | - | F_c | | / \sum | F_o | \text{ for } F_o^2 > 2\sigma(F_o^2).$$

$${}^b R_w(F_o^2) = \{ (\sum [w(F_o^2 - F_c^2)^2]) / \sum w F_o^4 \}^{1/2} \text{ for all data.}$$

$$w^{-1} = \sigma^2(F_o^2) + (zP)^2, \text{ where } P = (\text{Max}(F_o^2, 0) + 2 F_c^2) / 3.$$

**Table S2.** Selected bond lengths (Å) and bond angles for LiSr<sub>3</sub>Be<sub>3</sub>B<sub>3</sub>O<sub>9</sub>F<sub>4</sub>.

---

|        |           |            |           |
|--------|-----------|------------|-----------|
| Sr1–F2 | 2.414(7)  | Be1–F1     | 1.546(12) |
| Sr1–F2 | 2.451(4)  | O2–B1–O2   | 124.2(9)  |
| Sr1–O2 | 2.615(4)  | O2–B1–O1   | 117.8(4)  |
| Sr1–O2 | 2.951(5)  | O2–Be1–O2  | 108.5(8)  |
| Sr1–O1 | 2.700(5)  | O2–Be1–O1  | 110.9(6)  |
| B1–O1  | 1.401(12) | O2–Be1–F1  | 108.7(6)  |
| B1–O2  | 1.361(6)  | O1–Be1–F1  | 108.9(9)  |
| Be1–O1 | 1.533(14) | F2–Li1–F2  | 86.5(16)  |
| Be1–O2 | 1.529(8)  | F2–Li1–F1  | 127.7(11) |
| Li1–F1 | 2.51(5)   | Be1–F1–Be1 | 118.9(3)  |
| Li1–F2 | 2.20(3)   | B1–O2–Be1  | 122.4(7)  |

---

**Table S3.** Atomic coordinates and equivalent isotropic displacement parameters for  $\text{LiSr}_3\text{Be}_3\text{B}_3\text{O}_9\text{F}_4$ .

| Atom | Wyckoff | x/a        | y/b        | z/c        | Ueq [ $\text{\AA}^2$ ] |
|------|---------|------------|------------|------------|------------------------|
| Sr1  | 9b      | 0.06773(8) | 0.53387(4) | 1.0020(2)  | 0.0067(3)              |
| O1   | 9b      | 0.2283(4)  | 0.7717(4)  | 0.8089(9)  | 0.0092(13)             |
| O2   | 18c     | 0.2359(5)  | 0.9975(5)  | 0.8805(5)  | 0.0091(11)             |
| F1   | 3a      | 1/3        | 2/3        | 0.6098(15) | 0.020(2)               |
| F2   | 9b      | -0.1383(8) | 0.4308(4)  | 0.8146(9)  | 0.0179(13)             |
| B1   | 9b      | 0.1529(6)  | 0.8471(6)  | 0.8555(13) | 0.005(2)               |
| Be1  | 9b      | 0.2472(7)  | 0.7528(7)  | 0.6298(15) | 0.003(2)               |
| Li1  | 3a      | -1/3       | 1/3        | 0.979(6)   | 0.038(10)              |
